# Supplementary material
Source: Elsevier journal article supplement (https://www.sciencedirect.com/science/article/pii/S0034935615001747)
Supplement: mmc1 [file S0034935615001747:mmc1.docx]

Tabla S1. Priorización de los desenlaces de interés.

|  |  |  |
| --- | --- | --- |
| **Nombre de la variable** | **Mediana*** | **Valor**** |
| Mortalidad a los 28-30 días | 8,5 | CRITICA |
| Insuficiencia renal | 8 | CRITICA |
| Efectos Adversos: Coagulopatía | 8 | CRITICA |
| Efectos Adversos: hemorragia clínica | 8 | CRITICA |
| Efectos Adversos: Reacción anafiláctica | 8 | CRITICA |
| Edema pulmonar | 7 | CRÍTICA |
| Efectos Adversos: Hipervolemia | 7 | CRITICA |
| Tiempo de ventilación mecánica (pacientes en UCI) | 6,5 | CRITICA |
| Insuficiencia cardíaca | 6,5 | IMPORTANTE |
| Duración estancia en UCI | 6,5 | IMPORTANTE |
| Insuficiencia respiratoria- SDRA | 6 | IMPORTANTE |
| Infección herida quirúrgica | 6 | IMPORTANTE |
| Duración estancia hospitalaria | 6 | IMPORTANTE |
| Tiempo de recuperación de la alimentación oral | 6 | IMPORTANTE |
| Sepsis | 6 | IMPORTANTE |
| Náusea  vómitos | 6 | IMPORTANTE |
| Efectos Adversos: Prurito | 6 | IMPORTANTE |
| Infarto de miocardio | 5,5 | IMPORTANTE |
| Trombosis venosa | 5,5 | IMPORTANTE |
| Neumonía | 5 | IMPORTANTE |
| Calidad de vida | 5 | IMPORTANTE |
| Arritmias | 4,5 | IMPORTANTE |
| Infección urinaria | 4,5 | IMPORTANTE |
| Infección intestinal | 4,5 | IMPORTANTE |

*Mediana de la puntuación de la importancia de los desenlaces, valorado por anestesiólogos (n=4). **Interpretación en el sistema GRADE

Tabla S2. Estrategia de búsqueda

| **Pregunta clínica:** Búsqueda general | | |
| --- | --- | --- |
| MEDLINE  PubMed | 26.11.2013 | #31 surg*[ti] 472064  #32 surgery[tiab] 744531  #33 surgical[tiab] 650456  #34 intra-operative[tiab] 7592  #35 intraoperative[tiab] 72583  #36 peri-operative[tiab] 3844  #37 perioperative[tiab] 51257  #38 post-operative[tiab] 36066  #39 postoperative[tiab] 300861  #40 operati*[tiab] 593840  #41 “Perioperative Care”[MeSH] 119733  #42 “Intraoperative Care”[MeSH] 13350  #43 “Postoperative Care”[MeSH] 50712  **#44 #31 OR #32 OR #33 OR #34 OR #35 OR #36 OR #37 OR #38 OR #39 OR #40 OR #41 OR #42 OR #43 1749605 [surgery]**  #45 “Fluid Therapy”[MeSH] 13910  #46 fluid replacement[tiab] 1364  #47 fluid treatment[tiab] 150  #48 fluid administration[tiab] 1325  #49 fluid management[tiab] 1167  #50 fluid therapy[tiab] 2132  #54 fluid balance[tiab] 3343  #55 fluid responsiveness[tiab] 432  #56 fluid resuscitation[tiab] 3033  #57 resuscitation fluid*[tiab] 478  **#58 #45 OR #46 OR #47 OR #48 OR #49 OR #50 OR #51 OR #52 OR #53 OR #54 OR #55 OR #56 OR #57 22575 [fluid therapy]**  #59 “Hypertonic Solutions “[MeSH] 10632  #60 crystalloid*[tiab] 4886  #61 “Isotonic Solutions”[MeSH] 7047  #62 saline[tiab] 130917  #63 ringer*[tiab] 12044  #64 Hartmann*[tiab] 3068  #65 sodium chloride[tiab] 12515  #67 dextrose[tiab] 7903  #68 SSH[tiab] 1428  **#69 #59 OR #60 OR #61 OR #62 OR #63 OR #64 OR #65 OR #67 OR #68 178108 [crystalloids]**  #70 “Colloids”[MeSH] 87317  #71 “Hetastarch”[MeSH] 2381  #72 colloid*[tiab] 38025  #73 dextran*[tiab] 29125  #74 gelatin[tiab] 17338  #75 hetastarch[tiab] 423  #76 hydroxyethyl starch[tiab] 2251  #77 starch*[ti] 8512  #78 HES[tiab] 3548  #79 HAES[tiab] 146  #80 tetrastarch[tiab] 22  #81 pentastarch[tiab] 139  #82 albumin[tiab] 110209  **#83 #70 OR #71 OR #72 OR #73 OR #74 OR #75 OR #76 OR #77 OR #78 OR #79 OR #80 OR #81 OR #82 276926 [colloids]**  #84 systematic[sb] 216277  #85 review[pt] 1805319  #86 (randomized controlled trial[pt] OR controlled clinical trial[pt] OR randomized[tiab] OR placebo[tiab] OR drug therapy[sh] OR randomly[tiab] OR trial[tiab] OR groups[tiab]) NOT (animals [mh] NOT humans [mh]) 2802224  #87 "Meta-analysis"[pt] 41882  #88 #84 OR #87 216738  #92 #44 AND #58 4796 [fluid therapy in surgery]  **#97 #92 AND #88 207 [SR in fluid therapy in surgery]**  #100 #69 OR #83 443344  #101 #100 AND #44 36936 [fluids therapy in surgery]  #102 #101 AND #88 460  **#103 #102 NOT #97 380 [SR in fluids in surgery]**  #105 #97 OR #103 587  #106 #83 AND #88 1282  **#107 #106 NOT #105 1020 [SR in colloids]**  #108 #97 OR #103 OR #107 1607  #109 #92 AND #86 1417  **#110 #109 NOT #108 1323 [RCT in fluid therapy in surgery]**  #111 #97 OR #103 OR #107 OR #110 2930  #118 #44 AND #83 17194  #119 #118 AND #86 4431  **#120 #119 NOT #111 3997 [RCT colloids in surgery]** |

Tabla S3. Evidencias y recomendaciones para la elección de fluido (coloides vs cristaloides) para restauración de la volemia en cirugía no cardíaca

| **Pregunta 1. ¿Qué tipo de fluido (coloides o cristaloides) presenta el mejor perfil de seguridad para la restauración de volumen en el perioperatorio de cirugía no cardíaca?** | | |
| --- | --- | --- |
| **Recomendación** | | |
| En pacientes sometidos a cirugía no cardiaca se sugiere el uso de la fluidoterapia con cristaloides frente a la fluidoterapia con coloides. | ***Recomendación débil a favor*** | |
| **Justificación** | | |
| Los estudios disponibles no han mostrado diferencias entre el uso de coloides y los cristaloides para desenlaces críticos como mortalidad, deterioro de la función renal, coagulopatía, entre otros (calidad de la evidencia baja). Así mismo, el coste de los coloides es superior al de los cristaloides. Por todo ello, se formuló una recomendación débil a favor de los cristaloides. | | |
| **Consideraciones para la investigación** | | |
| Se necesitan ensayos clínicos de mejor calidad metodológica y con un tamaño muestral adecuado que evalúen los desenlaces críticos, así como estudios que evalúen la relación coste-efectividad de las intervenciones. | | |
|  | | |
| **De la evidencia a la recomendación** | | |
| ***Calidad de la evidencia*** | | |
| Se identificaron 3 tipos de comparaciones según el tipo de coloide: 1) Albúmina frente a cristaloides; 2). Hidroxietilalmidón (HEA) frente a cristaloides; 3) Gelatinas frente a cristaloides. La calidad global de la evidencia es baja en general, debido al riesgo de sesgo y la imprecisión de los resultados. | | |
| ***Balance beneficio riesgo*** | | |
| En general, no se observaron diferencias significativas entre ninguno de los tres tipos de coloides y los cristaloides para ninguno de los desenlaces críticos o importantes analizados.  1. Albúmina frente a cristaloides:  La fluidoterapia con albúmina no ha demostrado diferencias significativas frente a los cristaloides en mortalidad, riesgo de insuficiencia renal, coagulopatía, hemorragia clínica, trombosis venosa, duración de la estancia en UCI o en la duración de la estancia hospitalaria.  2. Hidroxietilalmidón (HEA) frente a cristaloides:  La terapia con HEA no ha demostrado diferencias significativas frente a los cristaloides en mortalidad, riesgo de insuficiencia renal, edema agudo de pulmón, coagulopatía, infarto de miocardio, sepsis, duración de la estancia en UCI o en la duración de la estancia hospitalaria.  3. Gelatinas frente a cristaloides:  La fluidoterapia con gelatinas no ha demostrado diferencias significativas frente a los cristaloides en mortalidad, pérdida de sangre en el intraoperatorio o durante las primeras 24 horas del postoperatorio, insuficiencia cardiaca, infarto de miocardio o trombosis venosa. | | |
| ***Importancia de los desenlaces de interés*** | | |
| No se identificaron estudios sobre valores y preferencias de los pacientes. Sin embargo, debido a la potencial ausencia de efectos indeseables consideramos que este aspecto no es determinante para la recomendación. | | |
| ***Uso de recursos y costes*** | | |
| El coste de los coloides es superior al de los cristaloides. | | |
|  | | |
| **Resumen de la evidencia sobre efectividad** | | |
| Se identificaron 11 revisiones sistemáticas (RS) que han evaluado el efecto de los coloides y cristaloides sobre la mortalidad, la función renal y algunos aspectos de seguridad en pacientes de cirugía no cardiaca. En general, las RS incluyeron ensayos clínicos de pacientes en diversos contextos (perioperatorio, sepsis, quemaduras, cuidados intensivos) excepto en un caso, que incluyó exclusivamente pacientes sometidos a intervenciones de cirugía de aorta abdominal (Toomtong 2010).  *Nota: No se tuvieron en cuenta los estudios del autor Boldt debido a que sus trabajos fueron desestimados en la comunidad científica por acciones poco éticas desde un punto de vista científico.*  Se realizó un análisis en conjunto de los estudios individuales incluidos en las anteriores RSs, publicados a partir del año 2000, realizados en pacientes durante el perioperatorio de cirugía no cardiaca en general y que analizaron de forma directa los coloides frente a los cristaloides en relación a los desenlaces críticos de interés. Se descartaron los estudios sobre la poligelina y los dextranos dado que ya no se utilizan en nuestro entorno.  No se analizaron en conjunto los coloides frente a los cristaloides, porque en la literatura encontrada referenciaban que es inadecuado combinar las estimaciones del efecto a partir de estudios de diferentes coloides (Perel 2013).  Una RS Cochrane actualizada hasta octubre 2012 (Perel 2013) tuvo por objetivo comparar coloides frente a cristaloides sobre la mortalidad en pacientes críticos (70 estudios, 20407 pacientes). De los estudios incluidos, 18 analizaron la fluidoterapia en pacientes sometidos a cirugía no cardíaca. De estos, 16 evaluaron la comparación de diferentes tipos de coloides frente a cristaloides, pero solo dos estudios fueron publicados en 2000 o más adelante:  -Albúmina: un estudio (Evans 2003)  -Gelatina modificada: dos estudios (Evans 2003, Fries 2004)  Otra RS Cochrane, actualizada hasta mayo del 2013 (Mutter 2013), evaluó los efectos de los HEA en la función renal (42 estudios, 11399 pacientes). Ocho estudios se llevaron a cabo con pacientes de cirugía no cardiaca y solo uno de ellos comparó HEA con cristaloides (Yang 2011).  Una RS (Hartog 2011) evaluó los almidones de tercera generación (peso molecular 130/0,4) en reanimación (56 ECA, 3608 pacientes). Veintisieste estudios se realizaron en el perioperatorio de cirugía no cardiaca y de ellos 10 compararon HEA con cristaloides (Bulanov 2004, Chen 2006, Jin 2009, Jover 2009, Haentjens 2009, Ko 2007, Langeron 2001, Liang 2006, Mittermayr 2007, Volta 2006).  Otra RS (Groeneveld 2011) también describió la evidencia disponible sobre la seguridad de los HEA (42 ECAs, 10382 pacientes). De los estudios incluidos 16 se realizaron en pacientes sometidos a cirugía no cardiaca, de los cuales dos compararon HEA versus cristaloides. (Innerhofer 2002, Mittermayr 2007).  La RS Cochrane que evaluó la eficacia de diferentes fluidos no sanguíneos en cirugía de aorta abdominal (Toomtong 2010) incluyó 38 estudios para un total 1589 pacientes, siete estudios compararon coloides versus cristaloides, pero solo uno se llevó a cabo después del año 2000. (Soskic 2005).  Otras seis revisiones (Gattas 2013, Guillies 2013, Martin 2013, Van Der Linden 2013 y Saw 2012) fueron excluidas porque los estudios analizados ya habían sido incluidos por las revisiones ya mencionadas, a excepción de dos ensayos clínicos (Parker 2004 y Hung 2012) que también fueron considerados para el desarrollo de esta pregunta.  Se encontraron cinco estudios adicionales, que fueron publicados después de las búsquedas efectuadas en las revisiones sistemáticas incluidas (Hamaji 2012, Topcu 2012, Feldheiser 2013, Rasmussen 2013, Yates 2013) y que también fueron tenidos en cuenta para el desarrollo de esta pregunta, a excepción del estudio de Topcu 2012 que no analizó desenlaces de interés.  A continuación se analizan los desenlaces de interés para cada uno de los coloides. | | |
| **1. Albúmina frente a cristaloides** | | |
| **Mortalidad a los 28-30 días** | | |
| Dos ECA (82 pacientes) evaluaron la albúmina frente a las soluciones cristaloides y no mostraron una reducción significativa de la mortalidad entre ambos tratamientos. (2 ECA, 0 eventos, Diferencia de riesgos0 IC95 de -0,07 a 0,07). (Evans 2003, Yang 2011). | | **Calidad**  **MUY BAJA** |
| **Deterioro de la función renal** | | |
| Un ensayo clínico (Yang 2011) no mostró diferencias entre la albúmina y los coloides respecto al riesgo de insuficiencia renal (1 ECA, 55 pacientes, 0 eventos, Diferencia de riesgos0 IC95 de -0,07 a0,07). Los autores no especificaron la definición de este desenlace, uno de ellos presentó niveles de BUN y creatinina normales en ambos grupos y no utilizaron la clasificación RIFLE para la definición de la lesión renal aguda (RIFLE proviene un acrónimo de los términos en inglés: Risk, Injury, Failure, Loss, End stage kidney diesease). | | **Calidad**  **MUY BAJA** |
| **Efecto adverso: coagulopatía (pérdida de sangre en el intraoperatorio)** | |  |
| El ensayo clínico de Yang (2011) describió la pérdida de sangre en el intraoperatorio (55 pacientes), no mostraron una reducción significativa de las pérdidas sanguíneas entre albumina y cristaloides ((1 ECA, 55 pacientes, diferencia de medias 14 ml a favor de los cristaloides IC95% de -119,24 a 147,24). | | **Calidad**  **MUY BAJA** |
| **Hemorragia clínica** | |  |
| En el ensayo clínico de Yang (2011) no se observaron casos de hemorragia clínica (1 ECA, 55 pacientes, diferencia de riesgos 0 IC95% de -0,07 a 0,07). | | **Calidad**  **MUY BAJA** |
| **2. Hidroxietilalmidón (HEA) 130/04 o 130/042 frente a cristaloides** | | |
| **Mortalidad a los 28-30 días** | | |
| Un total de 5 ECA (433 pacientes) evaluaron el tratamiento con HEA 130/0,4 o 130/0,42 frente a los cristaloides, no mostraron diferencias significativas en la reducción del riesgo de mortalidad entre ambas intervenciones (5 ECA, 433 pacientes, 9 eventos, RR 2,57 IC95% de0,7 a 9,49) (Feldheiser 2013, Hamaji 2012, Hung 2012, Yang 2011, Yates 2013) | | **Calidad**  **BAJA** |
| **Deterioro de la función renal** | |  |
| Un único estudio que comparó HEA frente a cristaloides utilizó la clasificación RIFLE para evaluar el deterioro de la función renal (Yang 2011). Este ECA incluyó 51 pacientes y solo presentó un evento en el grupo de cristaloides, que fue clasificado en la categoría de riesgo, sin mostrar diferencias significativas en el riesgo de deterioro de la función renal entre ambas intervenciones (1 evento, RR 0,32 IC 95% de 0,01 a 7,53). | | **Calidad**  **BAJA** |
| Cuatro ECAs presentaron los resultados del desenlace de deterioro de la función renal y no mostraron diferencias entre las intervenciones evaluadas (4 estudios, 353 pacientes, 5 eventos RR 5,79 IC95% de 0,70 a 4,67). (Feldheiser 2013, Hamaji 2012, Yang 2011, Yates 2013).  Los estudios utilizaron diferentes definiciones de deterioro de la función renal: Feldheiser 2013 reportó la definición de deterioro de función renal, Hamaji 2012 mencionó que uno de los pacientes en el grupo de HEA presentó complicaciones renales sin definir qué tipo de complicación. Yang 2011 utilizó la clasificación de RIFLE y Yates 2013 describió el número de casos con falla renal pero no definió dicho desenlace. | | **Calidad**  **MUY BAJA** |
| **Edema agudo de pulmón** | |  |
| Un estudio analizó la frecuencia de edema agudo de pulmón (Yates 2013) y no mostró diferencias significativas en el riesgo de presentar edema agudo de pulmón entre el HEA y los cristaloides. (1 ECA, 206 pacientes, 7 eventos, RR 2,36 IC95% de 0,47 a 11,88). | | **Calidad**  **MODERADA** |
| **Efecto adverso: coagulopatía** | |  |
| En tres estudios que analizaron la pérdida de sangre en el intraoperatorio no se observaron diferencias entre HEA y cristaloides (3 estudios, 155 pacientes, Diferencia de medias -33,73 ml IC95% de -180,18 a 112,73). (Hung 2012, Jin 2010, Yang 2011). Tampoco se evidenciaron diferencias en los tres estudios que analizaron la pérdida de sangre en las primeras 24 horas postquirúrgicas (3 estudios, 287 pacientes, Diferencia de medias 329,60 ml IC95% de -69,48 a 728,67).(Hamaji 2012, Rasmussen 2013, Yates 2013) | | **Calidad**  **MUY BAJA** |
| **Infarto de miocardio** | |  |
| En el estudio de Yates 2013 en pacientes de cirugía colorrectal se presentaron 11 casos de infarto de miocardio en el grupo de HEA y 4 casos en el grupo de cristaloides, sin embargo no hubo diferencias significativas en el riesgo de infarto de miocardio entre las intervenciones (1 ECA, 206 pacientes, 15 eventos, RR 2,59 IC95% de 0,85 a 7,88) | | **Calidad**  **BAJA** |
| **Sepsis** | |  |
| El ECA de Yates 2013, no mostró diferencias significativas en el riesgo de sepsis entre el HEA y los cristaloides. (1 ECA, 206 pacientes, 21 eventos, RR 1,53 IC95% de 0,66 a 3,54) | | **Calidad BAJA** |
| **Duración estancia en UCI** | |  |
| Yang 2011 calculó la estancia media en UCI en pacientes sometidos a hepatectomía sin encontrar diferencias significativas en este desenlace entre HEA y cristaloides (1 ECA, 51 pacientes, Diferencia de medias -0.10 días IC95% de -0.51 a 0.31). | | **Calidad**  **BAJA** |
| **3. Gelatina modificada frente a cristaloides** | | |
| **Mortalidad a los 28-30 días** | | |
| Un total de 3 ECA (464 pacientes) evaluaron el tratamiento con gelatina modificada frente a cristaloides y observaron 28 muertes en total. No encontraron diferencias en la reducción de la mortalidad entre ambas intervenciones, al margen de la significación (4 ECA, 28 eventos, RR 2,11 IC95% de0,98 a 4,55) (Evans 2003, Fries 2004, Parker 2004). | | **Calidad**  **BAJA** |
| **Efecto adverso: coagulopatía** | |  |
| En dos estudios con pacientes de cirugía oncológica y de rodilla se evaluó la pérdida de sangre en el intraoperatorio (64 pacientes), el análisis conjunto no mostró diferencias significativas en el riesgo de pérdidas sanguíneas entre las intervenciones (2 ECA, 64 pacientes, diferencia de medias 0,33 IC95% de -50,14 a 50,80).  (Innerhofer 2002, Jin 2010).  En el estudio de Fries 2004, en pacientes de cirugía de rodilla, se evaluaron las pérdidas de sangre en las primeras 24 horas postquirúrgicas y no hubo diferencias significativas entre la gelatina modificada y los cristaloides y el riesgo de sangrado (1 ECA, 40 pacientes, Diferencia de medias 34,00 IC95% de -120,88 a 188,88) | | **Calidad**  **MUY BAJA** |
| **Insuficiencia cardíaca** | |  |
| El estudio de Parker 2004 (396 pacientes) realizado en pacientes con cirugía de cadera, no mostró diferencias significativas en el riesgo de desarrollar insuficiencia cardiaca entre las intervenciones. (1 ECA, 396 pacientes, 21 eventos, RR 1,63 IC95% de 0,69 a 3,83). | | **Calidad**  **BAJA** |
| **Infarto de miocardio** | |  |
| El estudio de Parker 2004,no encontró diferencias significativas entre la gelatina modificada y los cristaloides (1 ECA, 396 pacientes, 1 evento, RR 3,00 IC95% de 0,12 a 73,20). | | **Calidad**  **BAJA** |
| **Trombosis venosa** | |  |
| Parker 2004 no encontró diferencias significativas entre la gelatina modificada y los cristaloides y el riesgo de desarrollar trombosis venosa (1 ECA, 396 pacientes, 10 eventos, RR 1,00 IC95% de 0,29 a 3,40). | | **Calidad**  **MODERADA** |
| **Resumen de la evidencia sobre el uso de recursos y costes** | | |
| No se han identificado estudios de coste-efectividad relevantes para esta pregunta. Por otro lado, en nuestro entorno, el coste de los coloides es muy superior al de los cristaloides (ver tabla 2 y 3). | | |

**Tabla S4. Calidad de los estudios evaluados para los desenlaces de interés: Coloides frente a cristaloides (pregunta 1).**

| Desenlace evaluado | **Albúmina** | **Hidroxietilalmidón (HEA) 130/04 o 130/042** | **Gelatina modificada** |
| --- | --- | --- | --- |
| **Mortalidad a los 28-30 días** | MUY BAJA | BAJA | BAJA |
| **Deterioro de la función renal** | MUY BAJA | BAJA / MUY BAJA | No evaluado |
| **Edema agudo de pulmón** | No evaluado | MODERADA | No evaluado |
| **Insuficiencia cardíaca** | No evaluado | No evaluado | BAJA |
| **Infarto de miocardio** | No evaluado | BAJA | BAJA |
| **Arritmias** | No evaluado | No evaluado | No evaluado |
| **Sepsis** | No evaluado | BAJA | No evaluado |
| **Infección quirúrgica** | No evaluado | No evaluado | No evaluado |
| **Neumonia** | No evaluado | BAJA | No evaluado |
| **Insuficiencia respiratoria SDRA** | No evaluado | No evaluado | No evaluado |
| **Trombosis venosa** | No evaluado | No evaluado | MODERADA |
| **Naúsea o vómitos** | No evaluado | No evaluado | No evaluado |
| **Tiempo de recuperación de la alimentación oral** | No evaluado | No evaluado | No evaluado |
| **Efecto adverso: coagulopatía** | MUY BAJA | MUY BAJA | MUY BAJA |
| **Efecto adverso: hemorragia clínica** | MUY BAJA | No evaluado | No evaluado |
| **Efecto adverso: hipervolemia** | No evaluado | No evaluado | No evaluado |
| **Efecto adverso: prurito** | No evaluado | No evaluado | No evaluado |
| **Duración de la ventilación mecánica (pacientes en UCI)** | No evaluado | No evaluado | No evaluado |
| **Duración estancia en UCI** | No evaluado | BAJA | No evaluado |
| **Duración estancia hospitalaria** | No evaluado | No evaluado | No evaluado |
| **Calidad de Vida** | No evaluado | No evaluado | No evaluado |

| **Tabla S5. Evaluación de la función renal en la comparación entre cristaloides y coloides (pregunta 1).** | | | | | |
| --- | --- | --- | --- | --- | --- |
| **Estudio** | **Función renal basal** | | **Función renal post intervención** | | **Análisis/Conclusión** |
| Evans60 2003 | No evaluaron función renal | | | | |
| Feldheiser53 2013 | Creatinina sérica, Gelatinasa asociada con lipocalina del neutrófilo (NGAL) y diuresis preoperatoria reportadas en gráficos. No es posible extraer el valor exacto de la gráfica | | Creatinina sérica, Gelatinasa asociada con lipocalina del neutrófilo (NGAL) y diuresis 1 y 6 horas postoperatorio reportadas en gráficos. No es posible extraer el valor exacto de la gráfica | | La función renal perioperatoria no reveló diferencias entre grupos en la diuresi, creatinina ni NGAL perioperatorios. |
| Fries62 2004 | No evaluaron función renal | | | | |
| Hamaji51 2012 | Lactato de Ringer  Creatinina sérica (mg.dL-1)  Media (95%CI)  =0.82 (0.71-0.92) | HEA 130 / 0.4  Creatinina sérica (mg.dL-1)  Media (95%CI)  =0.86 (0.77-0.95) | Lactato de Ringer  1. Creatinina sérica 24 horas POP (mg.dL-1): Media (95%CI) = 0.87 (0.75 a 0.99) 2. Complicaciones renales  0/24 (0%) | HEA 130 / 0.4  1. Creatinina sérica (mg.dL-1) 24 horas POP,Media (95%CI) =0.86 (0.77-0.95) 2. Complicaciones renales 1/24(4%) | No hubo diferencias en la aparición de complicaciones cardiacas, respiratorias o renales |
| Hung63 2012 | No evaluaron función renal | | | | |
| Innerhofer65 2002 | No evaluaron función renal | | | | |
| Jin66 2010 | No evaluaron función renal | | | | |
| Parker67 2004 | No evaluaron función renal | | | | |
| Rasmussen42 2013 | Creatinina basal no reportada | | Lactato de Ringer  Creatinina (mmol/L) POP  Día 1= 88.6 (27.1) | HEA 130/0.4  Creatinina (mmol/L) POP  Día 1= 75.0 (16.2) | La creatinina (mmol/L) se elevó el primer día después de la cirugía en el grupo HEA 130/0.4, 75.0 (16.2) comparado con el grupo Ringer lactato 88.6 (27.1), P<0.01”. |
| Yang50 2011 | Lactato de Ringer  Creatinina (mmol/L) preoperatoria  Media (SD) = 77.4 (15.3) | A. HEA  Creatinina (mmol/L) preoperatoria  Media (SD)= 77.8 (20.0)  B. Albúmina  Creatinina (mmol/L) preoperatoria Media (SD) = 72.7 (11.4) | Lactato de Ringer  1. Insuficiencia renal= 0/25  2. Creatinina (mmol/L)POP, media (SD)  D1= 70.6 (18.3) D3= 60.6 (17.0)  D5= 58.3 (17.9) | A. HEA  1. Insuficiencia renal= 0/26 2. Creatinina(mmol/L) POP media (SD)  D1 = 73.4 (21.6)  D3 = 66.9 (19.2)  D5= 64.4 (18.3)   B. Albúmina  1. Insuficiencia renal= 0/30 2. Creatinina(mmol/L) POP media (SD)  D1 = 66.9 (15.6) D3= 59.3 (10.2) D5 = 60.1 (14.3) | Los niveles de creatinina y BUN estuvieron dentro de los rangos de normalidad, sin diferencias significativas entre los grupos |
| Yates52 2013 | Cristaloides  Insuficiencia/fallo renal 1/98 (1%) | HEA  Insuficiencia/fallo renal 1/104 (1%) | Cristaloides  Insuficiencia/fallo renal 0/98 (0%) | HEA  Insuficiencia/fallo renal 4/104 (4%) | Ninguno |
| HEA: Hidroxietilalmidón; POP: Período postoperatorio; D: día; | | | | | |

**Tabla S6. Evidencias y recomendaciones para la elección de coloide para restauración de la volemia en cirugía no cardíaca**

| **Pregunta 2. ¿Qué solución coloidea presenta mejor perfil y seguridad para la restauración de volumen en el perioperatorio de cirugía no cardíaca?** | |
| --- | --- |
| **Recomendación** | |
| En aquellos pacientes sometidos a cirugía no cardiaca, que se consideren subsidiarios de restauración de volumen con coloides*, se sugiere utilizar hidroxietilalmidón (HEA 130/0.42 o HEA 130/0.4) o gelatina modificada sobre albúmina. | ***Recomendación débil a favor*** |
| *necesidad de restauración rápida de la volemia no alcanzada sólo con cristaloides | |
| **Justificación** | |
| Los estudios disponibles no han mostrado diferencias entre los diferentes tipos de coloides para los desenlaces críticos como mortalidad, deterioro de la función renal, coagulopatía, entre otros (calidad de la evidencia baja). No obstante, el coste de la albúmina es muy superior al resto de coloides. Por todo ello, se formuló una recomendación débil a favor de utilizar hidroxietilalmidón o gelatina modificada. | |
| **Consideraciones para la investigación** | |
| Se necesitan ensayos clínicos de mejor calidad metodológica y con un tamaño muestral adecuado que evalúen los desenlaces críticos, así como estudios que evalúen la relación coste-efectividad de las intervenciones. | |
|  | |
| **De la evidencia a la recomendación** | |
| ***Calidad de la evidencia*** | |
| Se identificaron 3 tipos de comparaciones según el tipo de coloide: 1) Albúmina frente a Hidroxietil almidón (HEA); 2) Gelatina modificada frente a HEA; 3) HEA 130/0,42 frente a HEA 130/0,4. La calidad global de la evidencia es baja en general, debido al riesgo de sesgo y la imprecisión de los resultados. | |
| ***Balance beneficio riesgo*** | |
| En general, no se observaron diferencias significativas entre los tipos de coloides considerados para esta pregunta (albúmina, gelatina modificada, hidroxietilalmidón 130/0.42 o 130/0.4) para ninguno de los desenlaces críticos o importantes analizados.  1. Albúmina frente a HEA:  La fluidoterapia con albúmina no ha mostrado diferencias significativas frente a al hidroxietilalmidón en mortalidad, riesgo de deterioro de la función renal, riesgo de terapia renal sustitutiva, tiempo de ventilación mecánica, trombosis venosa, duración de la estancia en UCI o en la duración de la estancia hospitalaria. En un estudio se observó una tendencia a presentar menor sangrado en el post operatorio de 24 horas en el grupo de HEA, sin embargo dicha diferencia no se mantuvo a las 72 horas del post operatorio.  2. Gelatinas frente a HEA:  La fluidoterapia con gelatinas no mostró diferencias significativas frente al HEA en mortalidad, terapia renal sustitutiva, pérdida de sangre en el post operatorio de 24 horas, aparición de prurito, en la duración de la estancia en UCI o en la duración de la estancia hospitalaria.  3. Hidroxietilalmidón (HEA) de peso molecular 130/0,42 frente a HEA 130/0,4:  No se observaron diferencias entre el HEA de peso molecular 130/0.42 frente al de 130/0.4 respecto al sangrado intraoperatorio o al riesgo de trombosis. No se identificaron estudios que evaluaran los demás desenlaces de interés. | |
| ***Importancia de los desenlaces de interés*** | |
| No se identificaron estudios sobre valores y preferencias de los pacientes. Sin embargo, debido a la potencial ausencia de efectos indeseables consideramos que este aspecto no es determinante para la recomendación. | |
| ***Uso de recursos y costes*** | |
| El coste de la albúmina es muy superior al resto de los coloides. | |

| **Resumen de la evidencia sobre efectividad** | |
| --- | --- |
| Se identificaron 14 revisiones sistemáticas (RS) que han evaluado el efecto de los coloides sobre la mortalidad, la función renal y algunos aspectos de seguridad en pacientes críticos. En general, las RS incluyeron ensayos clínicos de pacientes en diversos contextos (perioperatorio, sepsis, quemaduras, cuidados intensivos).  *Nota: No se tuvieron en cuenta los estudios del autor Boldt debido a que sus trabajos fueron desestimados en la comunidad científica por acciones poco éticas desde un punto de vista científico.*  Se realizó un análisis en conjunto de los estudios individuales incluidos en las anteriores RSs, publicados a partir del año 2000, realizado en pacientes en el perioperatorio de cirugía no cardiaca en general y que analizaran las comparaciones directas entre coloides en relación a los desenlaces críticos de interés.  Una RS Cochrane actualizada hasta noviembre 2012 (Bunn 2012) tuvo por objetivo comparar el efecto de diferentes coloides en pacientes que requieren restauración de volumen (86 estudios, 5484 pacientes). De los estudios incluidos, 28 analizaron la fluidoterapia en pacientes sometidos a cirugía no cardíaca y de estos, seis estudios publicados a partir del año 2000 compararon diferentes tipos de coloides y analizaron los desenlaces de interés:  - Albúmina frente a HEA: 2 estudios (Mukhtar 2009, Yang 2011)  - Gelatina modificada frente a HEA: 4 estudios (Godet 2008, Mahmood 2007, Jin 2010, Mittermayr 2007)  Otra RS (Gattas 2013) evaluó los efectos de los HEA en la mortalidad y la función renal (35 ECAs, 10391 pacientes). De los estudios incluidos 13 se realizaron en pacientes sometidos a cirugía no cardiaca, de los cuales dos cumplían los criterios de selección. (Wu 2010, Zdolsek 2011).  Otras RS incluyeron estudios ya considerados en las revisiones mencionadas y aportaron algunos estudios adicionales:  -RS Cochrane (Mutter 2013): incluyó un estudio que comparó Albúmina frente a HEA (Yassen 2011).  -RS de Van Der Linden, et al (2013): incluyó un estudio que comparó Albúmina frente a HEA (Kim 2009).  -RS de Saw, et al (2012): incluyó un estudio (Liang 2006) que comparó Gelatina frente a HEA.  Otras revisiones (Guilles 2013, Martin 2013, Wiedermann 2012, Groeneveld 2011, Hartog 2011 y Toomtong 2010) fueron excluidas porque los estudios analizados ya habían sido incluidos por las revisiones ya mencionadas.  Se encontraron dos estudios adicionales, de publicación posterior a las búsquedas efectuadas en las revisiones sistemáticas incluidas (Staikou 2012 y Topcu 2012), sin embargo, dichos estudios no evaluaron desenlaces de interés para el desarrollo de esta pregunta.  Algunas RS sobre coloides fueron excluidas debido a que comparaban soluciones que no son de interés para la pregunta (HEA con peso molecular 200) o por el tipo de cirugía (Ishihara 2013, Zarychanski 2013)  A continuación se analizan los desenlaces de interés para cada uno de los coloides. | |
| **1. Albúmina frente a Hidroxietilalmidón (HEA)** | |
| **Mortalidad hasta el alta hospitalaria (No se identificaron estudios para mortalidad a los 28-30 días)** | |
| Dos ECA (96 pacientes) que evaluaron la albúmina frente a HEA, no mostraron una reducción significativa de la mortalidad entre ambos tratamientos. (2 ECA, 2 eventos, RR: 1 IC95% 0,07 a 14,9). (Mukhtar 2009, Yang 2011). | **Calidad**  **BAJA** |
| **Deterioro de la función renal** | |
| El deterioro de la función renal fue reportado a través de la escala RIFLE (acrónimo de los términos en inglés: Risk, Injury, Failure, Loss, End stage kidney diesease) en dos estudios (Yang 2011 y Yassen), sin embargo, en el estudio de Yang et al. no se presentaron eventos y en el estudio de Yassen et al. no se encontraron diferencias significativas entre los grupos (2 ECA, 4 eventos RR 2,15 IC95% 0,27 a 17,02).  En el estudio de Mukhtar et al. no se encontraron diferencias significativas en el riesgo de requerir terapia renal sustitutiva (1 ECA, 40 pacientes, 2 eventos, RR: 1 IC95% 0.07 a 14,90). | **Calidad**  **MUY BAJA**  **Calidad**  **MUY BAJA** |
| **Efecto adverso: coagulopatía (pérdida de sangre en el perioperatorio)** |  |
| En el estudio de Yang et al. no se encontraron diferencias significativas en la pérdida de sangre en el intraoperatorio (1 ECA, 56 pacientes, Diferencia de medias 47 ml IC95% -92,75 a 186,75 ml).  Otro estudio (Kim 2009) describió la pérdida de sangre 24 y 72 horas después de la cirugía. Se encontraron diferencias significativas a las 24 horas (1 ECA, 60 pacientes, Diferencia de medias de 203ml IC95% 7,97 a 398,03 ml a favor de HEA), pero no a las 72 horas (diferencia de medias 228ml IC95% -49,08 a 505,08). | **Calidad**  **BAJA**  **Calidad**  **MUY BAJA** |
| **Tiempo de ventilación (días)** |  |
| Dos ECA (100 pacientes) evaluaron el tiempo de ventilación mecánica. No se encontraron diferencias significativas entre albúmina y HEA (2 ECA, 100 pacientes, Diferencia de medias -0,18 IC95 de -1,42 a 1,06). | **Calidad**  **BAJA** |
| Otros desenlaces importantes pero no críticos se muestran al final del documento | |
| **2. Gelatina modificada frente a Hidroxietilalmidón (HEA)** | |
| **Mortalidad a los 28-30 días** | |
| Dos ECA (108 pacientes) evaluaron la albúmina frente a HEA, no mostraron una reducción significativa de la mortalidad entre ambos tratamientos. (2 ECA, 2 eventos, RR: 2,39 IC95% 0,37 a 15,28). (Godet 2008, Mahmood 2007). | **Calidad**  **BAJA** |
| **Deterioro de la función renal** |  |
| Ninguno de los estudios que compararon gelatina frente a HEA utilizó la escala RIFLE.  En el estudio de Mahmood et al. no se encontraron diferencias significativas en el riesgo de requerir terapia renal sustitutiva (1 ECA, 42 pacientes, 2 eventos, RR: 1 IC95% 0.07 a 14,95). | **Calidad**  **BAJA** |
| **Efecto adverso: coagulopatía** |  |
| En cuatro estudios que analizaron la pérdida de sangre en las primeras 24 horas del postoperatorio no se observaron diferencias entre gelatina y HEA (4 estudios, 143 pacientes, Diferencia de medias -21,47 ml IC95% de -68,35 a 25,41). (Jin 2010, Liang 2006, Mahmood 2007, Mittermayr 2007). | **Calidad**  **BAJA** |
| **3. Hidroxietilalmidón (HEA) de peso molecular 130/0,42 frente a HEA de peso molecular 130/0,4** | |
| **Efecto adverso: coagulopatía** |  |
| Se identificó un único estudio que describe la cantidad de sangrado intraoperatorio. No se encontraron diferencias significativas entre HEA 130/0,42 y HEA 130/0,4 (Zdolsek 2011, 40 pacientes, diferencia de medias= 28ml a favor del HEA 130/0,4 IC95% -188,99 a 244,99 ml). | **Calidad**  **MUY BAJA** |
| **Resumen de la evidencia sobre el uso de recursos y costes** | |
| No se han identificado estudios de coste-efectividad relevantes para esta pregunta. El coste de la albúmina es muy superior al resto de los coloides (Tabla 1). | |

**Tabla S7- Calidad de los estudios evaluados para los desenlaces de interés: Coloides frente a Hidroxietilalmidón (HEA) (pregunta 2).**

| Desenlace evaluado | **Albúmina** | **HEA 130/0,42 frente a 130/0,40** | **Gelatina modificada** |
| --- | --- | --- | --- |
| **Mortalidad a los 28-30 días** | BAJA | No evaluado | BAJA |
| **Deterioro de la función renal** | MUY BAJA | No evaluado | BAJA |
| **Edema agudo de pulmón** | No evaluado | No evaluado | No evaluado |
| **Insuficiencia cardíaca** | No evaluado | No evaluado | No evaluado |
| **Infarto de miocardio** | No evaluado | No evaluado | No evaluado |
| **Arritmias** | No evaluado | No evaluado | No evaluado |
| **Sepsis** | No evaluado | No evaluado | No evaluado |
| **Infección quirúrgica** | No evaluado | No evaluado | No evaluado |
| **Neumonía** | No evaluado | No evaluado | No evaluado |
| **Insuficiencia respiratoria SDRA** | No evaluado | No evaluado | No evaluado |
| **Trombosis venosa** | No evaluado | No evaluado | No evaluado |
| **Náuseas o vómitos** | No evaluado | No evaluado | No evaluado |
| **Tiempo de recuperación de la alimentación oral** | No evaluado | No evaluado | No evaluado |
| **Efecto adverso: coagulopatía** | BAJA / MUY BAJA | MUY BAJA | BAJA |
| **Efecto adverso: hemorragia clínica** | No evaluado | No evaluado | No evaluado |
| **Efecto adverso: hipervolemia** | No evaluado | No evaluado | No evaluado |
| **Efecto adverso: prurito** | No evaluado | No evaluado | No evaluado |
| **Duración de la ventilación mecánica (pacientes en UCI)** | BAJA | No evaluado | No evaluado |
| **Duración estancia en UCI** | No evaluado | No evaluado | No evaluado |
| **Duración estancia hospitalaria** | No evaluado | No evaluado | No evaluado |
| **Calidad de Vida** | No evaluado | No evaluado | No evaluado |

| **Tabla S8. Evaluación de la función renal en la comparación entre coloides (pregunta 2)** | | | | | | | | | |
| --- | --- | --- | --- | --- | --- | --- | --- | --- | --- |
| **Estudio** | **Función renal basal** | | | **Función renal post intervención** | | | | **Análisis/Conclusión** | |
| Evans602003 | No evaluaron función renal | | | | | | | | |
| Godet54 2008  NOTA. Estudio hecho en pacientes con función renal alterada (creatinineclearance preoperatorio <80mL min) | Gelatina  1. Creatinina sérica Media y rango: 54.3 (30.9–76.8)  2. Deterioro de función renal: Leve (CrCl>50 mL min): 18/33  Moderada (CrCl 30 a 50 mL min): 15/33 Severa (CrCl<30 mL min): 0/33 | HEA  1. Creatinina sérica  Media y rango: 55.1 (22.1–79.7)  2. Deterioro de función renal: Leve (CrCl>50 mL min): 20/32  Moderada (CrCl 30 a 50 mL min): 9/32 Severa (CrCl<30 mL min): 3/32 | | Gelatina  1. Pico máximo de creatinina (máximo cambio a partir de los niveles basales hasta el día 6 POP o hasta el alta)   Media (SD): 36.56 (103.3 mmol L) Mediana (rango) 4.0 (222 a 561)  2. Aclaramiento de creatinina Media: 53.5 (25.2) Leve (CrCl>50 mL min): 17/33  Moderada (CrCl 30 a 50 mL min):10/33  Severa (CrCl<30 mL min): 5/33  3. Disfunción renal POP (Cualquier incremento de la creatinina que esté por encima de los valores normales y que sea >44.2mmol o >0.5 mg d con respecto al nivel basal)  7/33  4. Oliguria 4/33  5. Anuria:  1/33 | | HEA  1. Pico máximo de creatinina  Media (SD): 26,3 (55.3 mmol) Mediana (rango) 4.5 (247 a 222)  2. Aclaramiento de creatinina  Media: 61.1 (34.2) Leve (CrCl>50 mL min): 17/32  Moderada (CrCl 30 a 50 mL min): 9/32 Severa (CrCl<30 mL min): 5/32   3. Disfunción renal POP : 8/32  4. Oliguria 3/32  5. Anuria: 0/32 | | 1. Diferencia en el pico máximo de creatinina. Análisis de no inferioridad  La no inferioridad de HEA vs gelatina se analizó por medio del IC unilateral al 95% no paramétrica apropiada para la diferencia HEA - gelatina [-∞ a 11 mmol]  2. Diferencia de medias en la depuración de creatinina POP  P= 0,184.  El HEA no es inferior a la gelatina respecto al riesgo de deterioro de función renal | |
| Jin66 2010 | No evaluaron función renal | | | | | | | | |
| Kim71 2009 | No evaluaron función renal | | | | | | | | |
| Liang72 2006 | No evaluaron función renal | | | | | | | | |
| Mahmood55 2007 | Datos basales de función renal no reportados | | | Gelatina  1. Necesidad de terapia de sustitución renal: 3/20  2. Creatinina sérica POP reportada en gráficos. No es posible extraer el valor exacto de la gráfica. | | HEA  1. Necesidad de terapia de sustitución renal: 1/21  2. Creatinina sérica POP reportada en gráficos. No es posible extraer el valor exacto de la gráfica | | La creatinina sérica media fue significativamente inferior en el grupo tratado con HEA que en el grupo gelatina en los días 1, 2 y 5 (P = 0,020; P = 0,045 y P = 0,045 respectivamente) | |
| Mittermayr73 2007 | No evaluaron función renal | | | | | | | | |
| Mukhtar56 2009 | Albúmina  1. Creatinina: Mediana y rango: 77 (36–194)  2. Deterioro de función renal: Leve (CrCl>50 mL min): 15/20  Moderada (CrCl 30 a 50 mL min): 5/20 Severa (CrCl<30 mL min): 0/20 | HEA  1. Creatinina: Media y rango: 100 (24–129)  2. Deterioro de función renal: Leve (CrCl>50 mL min): 11/20 Moderada (CrCl 30 a 50 mL min): 6/20 Severa (CrCl<30 mL min): 3/20 | | Albúmina  1. Necesidad de terapia de sustitución renal: 1/20  2. Creatinina sérica POP reportada en gráficos. No es posible extraer el valor exacto de la gráfica  3.Aclaramiento de creatinina POP reportada en gráficos. No es posible extraer el valor exacto de la gráfica | | HEA  1. Necesidad de terapia de sustitución renal: 1/20  2. Creatinina sérica POP reportada en gráficos. No es posible extraer el valor exacto de la gráfica  3. Aclaramiento de creatinina POP reportada en gráficos. No es posible extraer el valor exacto de la gráfica | | La creatinina sérica y el CrCl fueron similares en ambos grupos. La cistatina C plasmática tendió a elevarse más en el grupo HEA en los días 2 y 3, sin llegar a la significación estadística (P= 0,08). | |
| Ragaller79 2000 | No evaluaron función renal | | | | | | | | |
| Staikou74 2012 | No evaluaron función renal | | | | | | | | |
| Topcu75 2012 | No evaluaron función renal | | | | | | | | |
| Volta76 2007 | No evaluaron función renal | | | | | | | | |
| Wu57 2010 | Gelatina  Creatinina sérica antes de la incisión Media (SD) 728 (213) | | HEA  Creatinina sérica antes de la incisión Media (SD) 719 (217) | | Gelatina  Creatinina sérica al final de la cirugía Media (SD) 91 (36) | | HEA  Creatinina sérica al final de la cirugía Media (SD) 76 (20) | | La creatinina sérica disminuyó significativamente en el postoperatorio ambos grupos, sin diferencia entre los grupos. |
| Yang50 2011 | Albúmina  Creatinina preoperatoria media (SD)= 72.7 (11.4) | | HEA  Creatinina preoperatoria media (SD)= 77.8 (20.0) | | Albúmina  1. Insuficiencia renal= 0/30  2. Creatinina POP D1 media (SD)= 66.9 (15.6) Creatinina POP D3 media (SD)= 59.3 (10.2) Creatinina POP D5 media (SD)= 60.1 (14.3) | | HEA  Insuficiencia renal= 0/26  2. Creatinina POP D1 media (SD)= 73.4 (21.6) Creatinina POP D3 media (SD)= 66.9 (19.2) Creatinina POP D5 media (SD)= 64.4 (18.3) | | Los niveles de creatinina y BUN estuvieron dentro de los límites de normalidad, sin diferencias entre los grupos. |
| Yassen58 2011 | Datos basales de función renal no reportados | | | | Albúmina  RIFLE (riesgo o más)= 2/15 | | HEA  RIFLE (riesgo o más)= 2/30 | | Ninguno |
| Zdolsek78 2011 | No evaluaron función renal | | | | | | | | |
| CrCl: Aclaramiento de creatinina; HEA: Hidroxietilalmidón; POP: Período postoperatorio; D: día; | | | | | | | | | |
